# Supplementary material for: Community Structure, Biodiversity and Spatiotemporal Distribution of the Black Flies (Diptera: Simuliidae) Using Malaise Traps on the Highest Mountain in Thailand
Source: MDPI journal article supplement (doi:10.3390/insects12060504), 2021-05-31
Supplement: s1 [file s1]

## Supplementary 2

**Table S2:** Diversity parameters for black flies at six elevation sites in Doi Inthanon National Park.

| Collection sites      | Elevation | No. of species | Shannon_H | Simpson_1-D | Dominance_D | Evenness $e^H/S$ | Equitability_J | Chao-1 |
|-----------------------|-----------|----------------|-----------|-------------|-------------|------------------|----------------|--------|
| Wang kwai waterfall   | 400 m     | 6              | 1.38      | 0.6879      | 0.3121      | 0.6625           | 0.7702         | 21     |
| Wachirathan waterfall | 700 m     | 15             | 2.289     | 0.8698      | 0.1302      | 0.6579           | 0.8454         | 120    |
| Siribhume waterfall   | 1400 m    | 19             | 2.467     | 0.8868      | 0.1132      | 0.6204           | 0.8378         | 190    |
| Check point 2         | 1700 m    | 17             | 2.431     | 0.8889      | 0.1111      | 0.6691           | 0.8582         | 153    |
| Kiew mae pan          | 2200 m    | 16             | 2.24      | 0.8496      | 0.1504      | 0.587            | 0.8079         | 136    |
| Angka                 | 2500 m    | 10             | 1.794     | 0.7751      | 0.2249      | 0.6016           | 0.7793         | 55     |

Shannon\_H: varies from 0 for communities with only a single taxon to high values for communities with many taxa.

Simpson\_1-D: measures 'evenness' of the community from 0 to 1.

Dominance\_D: ranges from 0 (all taxa are equally present) to 1 (one taxon dominates the community completely).

Evenness  $e^H/S$ ; proportion of species present in site, ranging from 0 (few species dominate) to 1 (more equal species).

Equitability\_J; ranging from 0 to 1 with evenness being complete.

Chao1, an estimate of total species richness.
