# Supplementary material for: Community Structure, Biodiversity and Spatiotemporal Distribution of the Black Flies (Diptera: Simuliidae) Using Malaise Traps on the Highest Mountain in Thailand
Source: MDPI journal article supplement (doi:10.3390/insects12060504), 2021-05-31
Supplement: s1 [file s1]

# Supplementary 1

**Table S1:** Species composition, abundance, richness and frequency of fly species occurrence (SO) in streams from black flies collected in Doi Inthanon National Park.

| Elevations                          | 400 m |    |    | 700 m |    |    | 1400 m |    |    | 1700 m |    |    | 2200 m |    |    | 2500 m |    |    | Total | RB* | SO**<br>(%) |
|-------------------------------------|-------|----|----|-------|----|----|--------|----|----|--------|----|----|--------|----|----|--------|----|----|-------|-----|-------------|
| Seasons                             | R     | C  | H  | R     | C  | H  | R      | C  | H  | R      | C  | H  | R      | C  | H  | R      | C  | H  |       |     |             |
| Species                             |       |    |    |       |    |    |        |    |    |        |    |    |        |    |    |        |    |    |       |     |             |
| <i>S. (D) courtneyi</i>             | 0     | 0  | 0  | 7     | 2  | 0  | 4      | 0  | 0  | 0      | 0  | 0  | 0      | 0  | 0  | 0      | 0  | 0  | 13    | 0.3 | 33.3        |
| <i>S. (G) asakoe</i> sp. gr.        | 0     | 7  | 0  | 156   | 32 | 15 | 48     | 23 | 6  | 68     | 45 | 7  | 14     | 15 | 7  | 8      | 0  | 0  | 451   | 9.6 | 100         |
| <i>S. (G) burtoni</i>               | 0     | 0  | 0  | 4     | 5  | 3  | 4      | 9  | 0  | 0      | 0  | 0  | 0      | 0  | 0  | 0      | 0  | 0  | 25    | 0.5 | 33.3        |
| <i>S. (G) chayamaritae</i>          | 0     | 0  | 0  | 0     | 0  | 0  | 0      | 0  | 0  | 4      | 3  | 0  | 0      | 0  | 0  | 0      | 0  | 0  | 7     | 0.1 | 16.6        |
| <i>S. (G) Chiangdaoense</i>         | 0     | 0  | 0  | 0     | 0  | 0  | 0      | 0  | 0  | 101    | 41 | 13 | 15     | 13 | 0  | 0      | 0  | 0  | 183   | 3.9 | 33.3        |
| <i>S. (G) chumpornense</i>          | 30    | 12 | 43 | 43    | 14 | 96 | 0      | 0  | 0  | 0      | 0  | 0  | 0      | 0  | 0  | 0      | 0  | 0  | 238   | 5.1 | 33.3        |
| <i>S. (G) inthanonense</i> complex  | 0     | 0  | 0  | 0     | 0  | 0  | 20     | 23 | 2  | 148    | 69 | 18 | 16     | 14 | 0  | 0      | 0  | 0  | 310   | 6.6 | 50          |
| <i>S. (G) sheilae</i>               | 0     | 0  | 0  | 11    | 5  | 0  | 0      | 0  | 0  | 0      | 0  | 0  | 0      | 0  | 0  | 0      | 0  | 0  | 16    | 0.3 | 16.6        |
| <i>S. (G) siamense</i> complex      | 22    | 12 | 5  | 35    | 23 | 6  | 0      | 0  | 0  | 0      | 0  | 0  | 0      | 0  | 0  | 0      | 0  | 0  | 103   | 2.2 | 33.3        |
| <i>S. (G) gombakense</i>            | 0     | 0  | 0  | 0     | 19 | 1  | 0      | 0  | 0  | 0      | 0  | 0  | 0      | 0  | 0  | 0      | 0  | 0  | 20    | 0.4 | 16.6        |
| <i>S. (G) maeklangense</i>          | 0     | 0  | 0  | 0     | 0  | 0  | 0      | 0  | 0  | 11     | 3  | 0  | 13     | 0  | 0  | 0      | 0  | 0  | 27    | 0.6 | 33.3        |
| <i>S. (M) angkaense</i>             | 0     | 0  | 0  | 0     | 0  | 0  | 0      | 0  | 0  | 0      | 13 | 0  | 0      | 5  | 0  | 54     | 82 | 13 | 167   | 3.6 | 50          |
| <i>S. (M) laoleense</i>             | 0     | 0  | 0  | 0     | 0  | 0  | 2      | 20 | 7  | 7      | 22 | 0  | 0      | 0  | 0  | 0      | 0  | 0  | 58    | 1.2 | 33.3        |
| <i>S. (M) merga</i>                 | 0     | 0  | 0  | 0     | 0  | 0  | 0      | 0  | 0  | 0      | 0  | 0  | 0      | 32 | 0  | 54     | 82 | 13 | 181   | 3.9 | 33.3        |
| <i>S. (M) phahompokense</i>         | 0     | 0  | 0  | 0     | 0  | 0  | 0      | 0  | 0  | 0      | 0  | 0  | 7      | 24 | 2  | 12     | 15 | 0  | 60    | 1.3 | 33.3        |
| <i>S. (M) surachaii</i>             | 0     | 0  | 0  | 0     | 0  | 0  | 0      | 0  | 0  | 0      | 0  | 0  | 0      | 0  | 0  | 2      | 8  | 0  | 10    | 0.2 | 16.6        |
| <i>S. (N) aureohirtum</i>           | 0     | 0  | 0  | 0     | 0  | 0  | 11     | 4  | 0  | 0      | 0  | 0  | 0      | 0  | 0  | 0      | 0  | 0  | 15    | 0.3 | 16.6        |
| <i>S. (N) chomthongense</i> complex | 0     | 0  | 0  | 0     | 0  | 0  | 0      | 0  | 0  | 0      | 0  | 0  | 102    | 32 | 11 | 75     | 26 | 2  | 248   | 5.3 | 33.3        |
| <i>S. (N) fangense</i>              | 0     | 0  | 0  | 0     | 0  | 0  | 0      | 0  | 0  | 8      | 14 | 0  | 0      | 0  | 0  | 0      | 0  | 0  | 22    | 0.5 | 16.6        |
| <i>S. (N) feuerborni</i> complex    | 0     | 0  | 0  | 0     | 0  | 0  | 3      | 12 | 0  | 0      | 0  | 0  | 0      | 0  | 0  | 0      | 0  | 0  | 15    | 0.3 | 16.6        |
| <i>S. (N) fruticosum</i>            | 0     | 0  | 0  | 0     | 0  | 0  | 0      | 0  | 0  | 49     | 33 | 4  | 6      | 0  | 3  | 0      | 0  | 0  | 95    | 2.0 | 33.3        |
| <i>S. (N) khunklangense</i>         | 0     | 0  | 0  | 0     | 0  | 0  | 0      | 0  | 0  | 5      | 0  | 0  | 0      | 0  | 0  | 0      | 0  | 0  | 5     | 0.1 | 16.6        |
| <i>S. (N) maeaiense</i>             | 0     | 0  | 0  | 0     | 0  | 0  | 0      | 0  | 0  | 38     | 34 | 8  | 0      | 16 | 0  | 0      | 0  | 0  | 96    | 2.0 | 33.3        |
| <i>S. (S) bullatum</i>              | 0     | 0  | 0  | 0     | 0  | 0  | 9      | 6  | 0  | 0      | 0  | 0  | 0      | 0  | 0  | 0      | 0  | 0  | 15    | 0.3 | 16.6        |
| <i>S. (S.) chamlongi</i>            | 0     | 0  | 0  | 35    | 6  | 0  | 31     | 24 | 6  | 27     | 22 | 7  | 0      | 0  | 0  | 0      | 0  | 0  | 158   | 3.4 | 50          |
| <i>S. (S.) crocinum</i>             | 0     | 0  | 0  | 0     | 0  | 0  | 14     | 9  | 0  | 0      | 0  | 0  | 0      | 0  | 0  | 0      | 0  | 0  | 23    | 0.5 | 16.6        |
| <i>S. (S.) digrammicum</i>          | 0     | 0  | 0  | 0     | 0  | 0  | 7      | 3  | 0  | 0      | 0  | 0  | 0      | 0  | 0  | 0      | 0  | 0  | 10    | 0.2 | 16.6        |
| <i>S. (S.) doipuiense</i> complex   | 0     | 0  | 0  | 0     | 0  | 0  | 70     | 51 | 25 | 79     | 65 | 9  | 0      | 0  | 0  | 0      | 0  | 0  | 299   | 6.4 | 33.3        |
| <i>S. (S.) kiewmaepanense</i>       | 0     | 0  | 0  | 0     | 0  | 0  | 0      | 0  | 0  | 0      | 0  | 0  | 32     | 24 | 10 | 0      | 0  | 0  | 66    | 1.4 | 16.6        |
| <i>S. (S.) luculentum</i>           | 0     | 0  | 0  | 0     | 0  | 0  | 0      | 0  | 0  | 13     | 14 | 0  | 0      | 0  | 0  | 0      | 0  | 0  | 27    | 0.6 | 16.6        |
| <i>S. (S.) mediocoloratum</i>       | 0     | 0  | 0  | 0     | 0  | 0  | 0      | 2  | 0  | 0      | 0  | 0  | 0      | 0  | 0  | 0      | 0  | 0  | 2     | 0.0 | 16.6        |
| <i>S. (S.) nigrogilvum</i>          | 0     | 9  | 1  | 20    | 20 | 5  | 32     | 33 | 16 | 5      | 34 | 0  | 0      | 25 | 0  | 0      | 11 | 9  | 220   | 4.7 | 100         |
| <i>S. (S.) nodosum</i>              | 0     | 0  | 0  | 18    | 17 | 16 | 0      | 0  | 0  | 0      | 0  | 0  | 0      | 0  | 0  | 0      | 0  | 0  | 51    | 1.1 | 16.6        |
| <i>S. (S.) phukaense</i>            | 0     | 0  | 0  | 0     | 0  | 0  | 0      | 0  | 0  | 0      | 0  | 0  | 2      | 2  | 0  | 0      | 0  | 0  | 4     | 0.1 | 16.6        |
| <i>S. (S.) fenestratum</i>          | 0     | 0  | 0  | 44    | 17 | 13 | 0      | 11 | 6  | 15     | 17 | 4  | 0      | 0  | 0  | 0      | 0  | 0  | 127   | 2.7 | 50          |
| <i>S. (S.) rudnicki</i>             | 0     | 0  | 0  | 1     | 0  | 2  | 0      | 0  | 0  | 0      | 0  | 0  | 0      | 0  | 0  | 0      | 0  | 0  | 3     | 0.1 | 16.6        |
| <i>S. (S.) setsukoae</i>            | 0     | 0  | 0  | 0     | 0  | 0  | 0      | 0  | 0  | 0      | 0  | 0  | 20     | 9  | 6  | 38     | 18 | 8  | 99    | 2.1 | 33.3        |

| Elevations                        | 400 m |     |    | 700 m |     |     | 1400 m |     |    | 1700 m |     |    | 2200 m |     |    | 2500 m |     |    | Total | RB*   | SO** (%) |
|-----------------------------------|-------|-----|----|-------|-----|-----|--------|-----|----|--------|-----|----|--------|-----|----|--------|-----|----|-------|-------|----------|
| Seasons                           | R     | C   | H  | R     | C   | H   | R      | C   | H  | R      | C   | H  | R      | C   | H  | R      | C   | H  |       |       |          |
| Species                           |       |     |    |       |     |     |        |     |    |        |     |    |        |     |    |        |     |    |       |       |          |
| <i>S. (S.) siripoomense</i>       | 0     | 0   | 0  | 22    | 7   | 0   | 0      | 9   | 1  | 0      | 0   | 0  | 0      | 0   | 0  | 0      | 0   | 0  | 39    | 0.8   | 33.3     |
| <i>S. (S.) striatum</i> sp. gr.   | 90    | 63  | 17 | 52    | 33  | 36  | 47     | 17  | 1  | 0      | 0   | 0  | 0      | 0   | 0  | 0      | 0   | 0  | 356   | 7.7   | 50       |
| <i>S. (S.) suchariti</i>          | 0     | 0   | 0  | 0     | 0   | 0   | 0      | 0   | 0  | 0      | 0   | 0  | 0      | 0   | 0  | 20     | 8   | 0  | 28    | 0.6   | 16.6     |
| <i>S. (S.) tani</i> complex       | 14    | 26  | 7  | 12    | 16  | 1   | 9      | 2   | 1  | 0      | 0   | 0  | 0      | 0   | 0  | 0      | 0   | 0  | 88    | 1.9   | 50       |
| <i>S. (S.) tenebrosum</i> complex | 0     | 0   | 0  | 0     | 0   | 0   | 0      | 0   | 0  | 0      | 0   | 0  | 162    | 65  | 15 | 235    | 29  | 11 | 517   | 11.1  | 33.3     |
| <i>S. (S.) undecimum</i>          | 0     | 0   | 0  | 0     | 0   | 0   | 0      | 0   | 0  | 0      | 0   | 0  | 75     | 37  | 12 | 0      | 0   | 0  | 124   | 2.7   | 16.6     |
| <i>S. (S.) yuphae</i>             | 0     | 0   | 0  | 0     | 0   | 0   | 0      | 3   | 0  | 33     | 19  | 5  | 0      | 0   | 0  | 0      | 0   | 0  | 60    | 1.3   | 33.3     |
| Seasonal abundance                | 156   | 129 | 73 | 460   | 216 | 194 | 311    | 261 | 71 | 611    | 448 | 75 | 464    | 313 | 66 | 498    | 279 | 56 |       | 100.0 |          |
| Seasonal richness                 | 4     | 6   | 5  | 14    | 13  | 11  | 15     | 18  | 10 | 16     | 16  | 9  | 12     | 14  | 8  | 9      | 9   | 6  |       |       |          |
| Localities richness               | 6     |     |    | 15    |     |     | 19     |     |    | 17     |     |    | 16     |     |    | 10     |     |    |       |       |          |

\* RB = Relative abundance; \*\*SO (%) = Species occurrence; R = Rainy; C = Cold; H = Hot
